# Supplementary material
Source: Springer Nature journal article supplement (https://www.springermedizin.de/resource/supplementary/12903_2013_288_MOESM1_ESM.pdf/9516540)

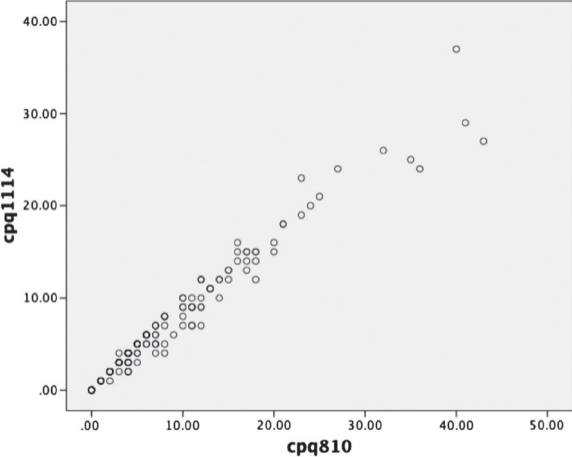

Legend: ° = CPQ score

Supplement: MOESM1 [file 9516540]
